# Supplementary material for: Multidisciplinary consensus guideline for the diagnosis and management of spontaneous intracranial hypotension
Source: HighWire-hosted journal article supplement (doi:10.1136/jnnp-2023-331166), 2023-05-05
Supplement: jnnp-2023-331166supp003_data_supplement.pdf [file jnnp-2023-331166supp003_data_supplement.pdf]

### Supplementary material 3. Audit tool

#### Clinical assessment and pathway:

1. At the time of initial assessment, was the patient asked about the postural component of the headache?

Yes ☐ No ☐

2. What was the time interval from the initial suspicion of spontaneous intracranial hypotension (SIH) to assessment by a neurologist?

<24 hours ☐ <48 hours ☐ <4 weeks ☐ <3 months ☐ >3 months ☐

3. Was the patient educated or directed to educational resources regarding:

Bed rest? Yes ☐ No ☐

Hydration? Yes ☐ No ☐

Analgesia? Yes ☐ No ☐

Methods to avoid deconditioning and deep vein thrombosis? Yes ☐ No ☐

4. At what point was the patient referred for multidisciplinary discussion in a specialist neuroscience centre?

Immediately after SIH was suspected ☐ After 1 epidural blood patch (EBP) ☐

After 2 EBPs ☐ After >2 EBPs ☐ N/A (not referred) ☐

#### Investigations:

1. What imaging was performed at the first assessment?

MRI head with contrast ☐ MRI head without contrast ☐

MRI whole spine ☐ Other (please specify) ☐ \_\_\_\_\_

2. Was the imaging reviewed by a consultant neuroradiologist?

Yes ☐ No ☐

3. Was lumbar puncture performed?

Yes, to measure opening pressure ☐ Yes, for other reasons ☐ No ☐

4. For patients with abnormal brain or spine MRI undergoing myelography, how many blood patches had been performed beforehand?

None ☐ 1 ☐ 2 ☐ > 2 (specify) ☐ \_\_\_\_\_

5. For patients with a spinal longitudinal epidural collection (SLEC) undergoing myelography, was “dynamic” myelography performed?

Yes ☐ No ☐

6. For patients without a SLEC undergoing myelography, was lateral decubitus myelography performed?

Yes, examining both sides ☐ Yes, one side only ☐ No ☐

#### Procedures:

1. Once diagnosis of SIH was made, how soon was the first non-targeted EBP performed?

<48 hours ☐ <2 weeks ☐ <4 weeks ☐ <3 months ☐ >3 months ☐

2. After EBP was the patient:

Given a point of contact for their clinical team? Yes ☐ No ☐

Contacted at 12-48 hours to enquire about concerning features? Yes ☐ No ☐

How soon was efficacy of EBP assessed?

<10 days ☐ 10-14 days ☐ 2-4 weeks ☐ 4-8 weeks ☐ >8 weeks ☐

3. Once a decision for to operate has been made, how soon was the date of surgery?

<2 weeks ☐ <6 weeks ☐ <3 months ☐ >3 months ☐

4. Was outcome assessed at the following intervals and included in an outcomes database?

6 weeks Yes ☐ No ☐

3 months Yes ☐ No ☐
